# Supplementary material
Source: bioRxiv or medRxiv preprint supplement (https://www.medrxiv.org/highwire/filestream/92152/field_highwire_adjunct_files/2/2020.08.03.20167262-3.pdf)
Supplement: Supplementary file [file 2020.08.03.20167262-3.pdf]

**Altitude as a protective factor from COVID-19**

Timothy M. Thomson<sup>1,2\*</sup>, Fresia Casas<sup>3</sup>, Harold Andre Guerrero<sup>3</sup>, Rómulo Figueroa-Mujica<sup>4</sup>, Francisco C. Villafuerte<sup>4\*</sup>, and Claudia Machicado<sup>3\*</sup>

**1** Institute for Molecular Biology, National Science Council (IBMB-CSIC),  
Barcelona, Spain

**2** Networked Center for Biomedical Research in Hepatic and Digestive  
Diseases (CIBER-EHD), Instituto Nacional de la Salud Carlos III, Madrid, Spain

**3** Laboratory of Translational Research and Computational Biology, Facultad de  
Ciencias y Filosofía-LID, Universidad Peruana Cayetano Heredia, Lima, Perú

**4** Laboratorio de Fisiología del Transporte de Oxígeno, Facultad de Ciencias y  
Filosofía-LID, Universidad Peruana Cayetano Heredia, Lima, Perú

**Table S3. Testing coverage by department**

| Departament   | Tested | Confirmed (+) | Population | Percent pop. tested |
|---------------|--------|---------------|------------|---------------------|
| CAJAMARCA     | 15751  | 700           | 1453711    | 1.08%               |
| AYACUCHO      | 7964   | 679           | 668213     | 1.19%               |
| PUNO          | 15038  | 321           | 1237997    | 1.21%               |
| HUANUCO       | 10388  | 811           | 760267     | 1.37%               |
| PIURA         | 29337  | 7180          | 2047954    | 1.43%               |
| CUSCO         | 19529  | 916           | 1357075    | 1.44%               |
| LORETO        | 15994  | 4109          | 1027559    | 1.56%               |
| JUNIN         | 21390  | 1755          | 1361467    | 1.57%               |
| AMAZONAS      | 6725   | 563           | 426806     | 1.58%               |
| APURIMAC      | 7434   | 162           | 430736     | 1.73%               |
| LA LIBERTAD   | 35987  | 3816          | 2016771    | 1.78%               |
| SAN MARTIN    | 16391  | 1151          | 899648     | 1.82%               |
| UCAYALI       | 12052  | 3645          | 589110     | 2.05%               |
| HUANCAVELICA  | 7794   | 407           | 365317     | 2.13%               |
| LAMBAYEQUE    | 29738  | 7060          | 1310785    | 2.27%               |
| ANCASH        | 27147  | 3384          | 1180638    | 2.30%               |
| ICA           | 23369  | 2691          | 975182     | 2.40%               |
| PASCO         | 8510   | 448           | 271904     | 3.13%               |
| TUMBES        | 8388   | 1219          | 251521     | 3.33%               |
| AREQUIPA      | 55479  | 3146          | 1497438    | 3.70%               |
| TACNA         | 14018  | 372           | 370974     | 3.78%               |
| CALLAO        | 43660  | 10781         | 1129854    | 3.86%               |
| LIMA          | 505710 | 92057         | 10628470   | 4.76%               |
| MADRE DE DIOS | 9118   | 450           | 173811     | 5.25%               |
| MOQUEGUA      | 16706  | 462           | 192740     | 8.67%               |

Epidemiological data reported on May 30, 2020 by:

- [https://covid19.minsa.gob.pe/sala\\_situacional.asp](https://covid19.minsa.gob.pe/sala_situacional.asp)
- [https://www.datosabiertos.gob.pe/group/datos-abiertos-de-covid-19?sort\\_by=changed&f%5B0%5D=field\\_tags%3A913](https://www.datosabiertos.gob.pe/group/datos-abiertos-de-covid-19?sort_by=changed&f%5B0%5D=field_tags%3A913)

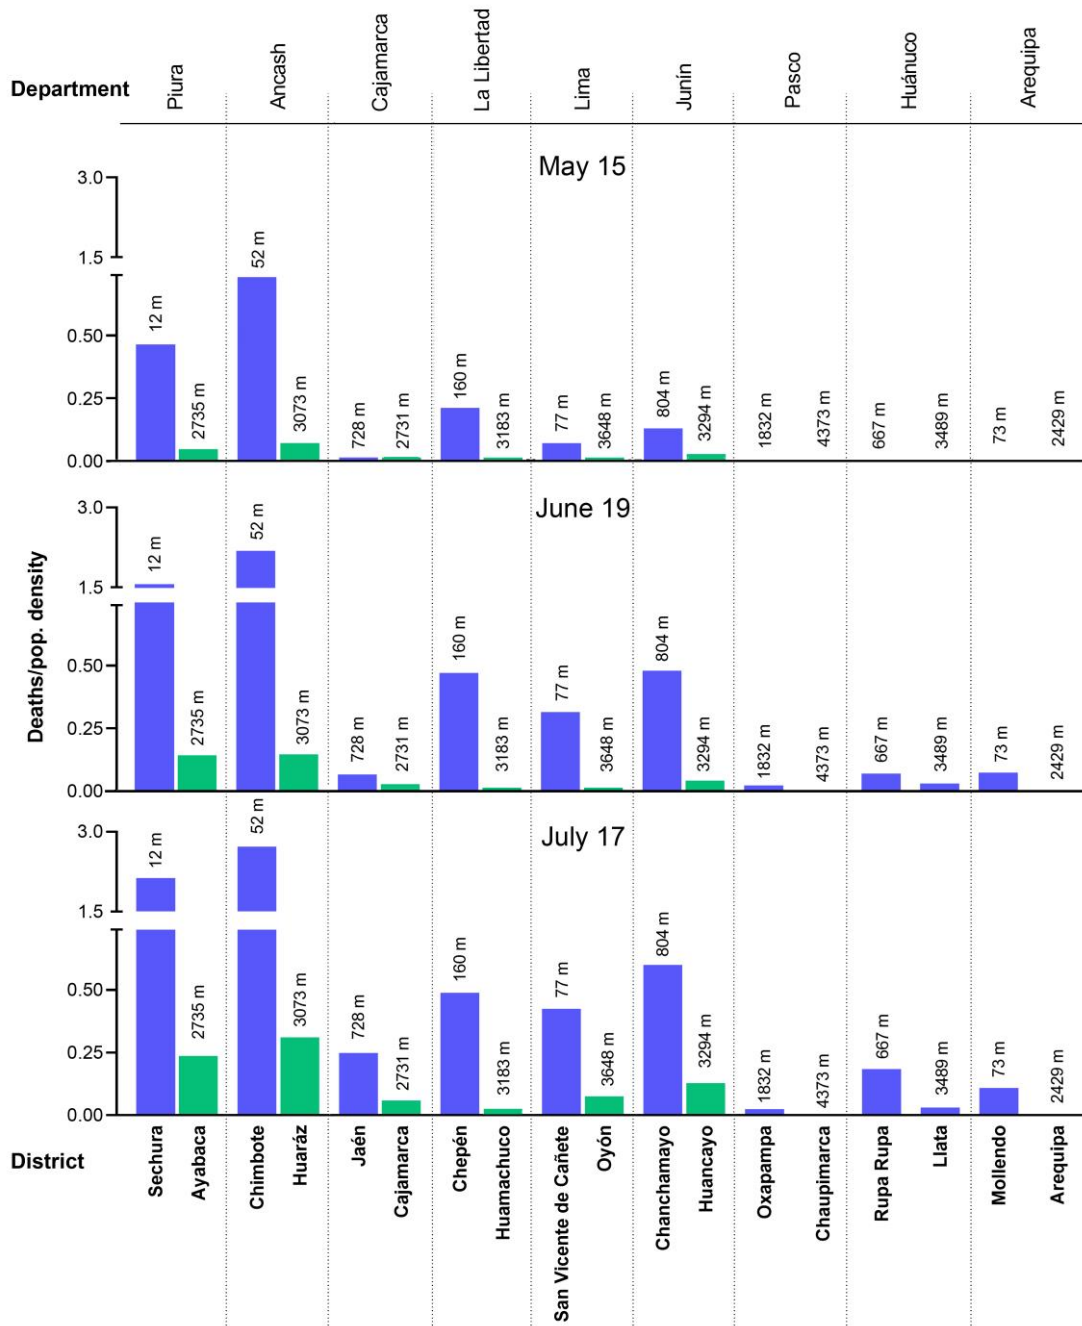

**Figure S1. Pairwise comparisons of death rates (per population density) between districts at low altitude (< 2,500 m) and high altitude (≥ 2,500 m) within the same district.**

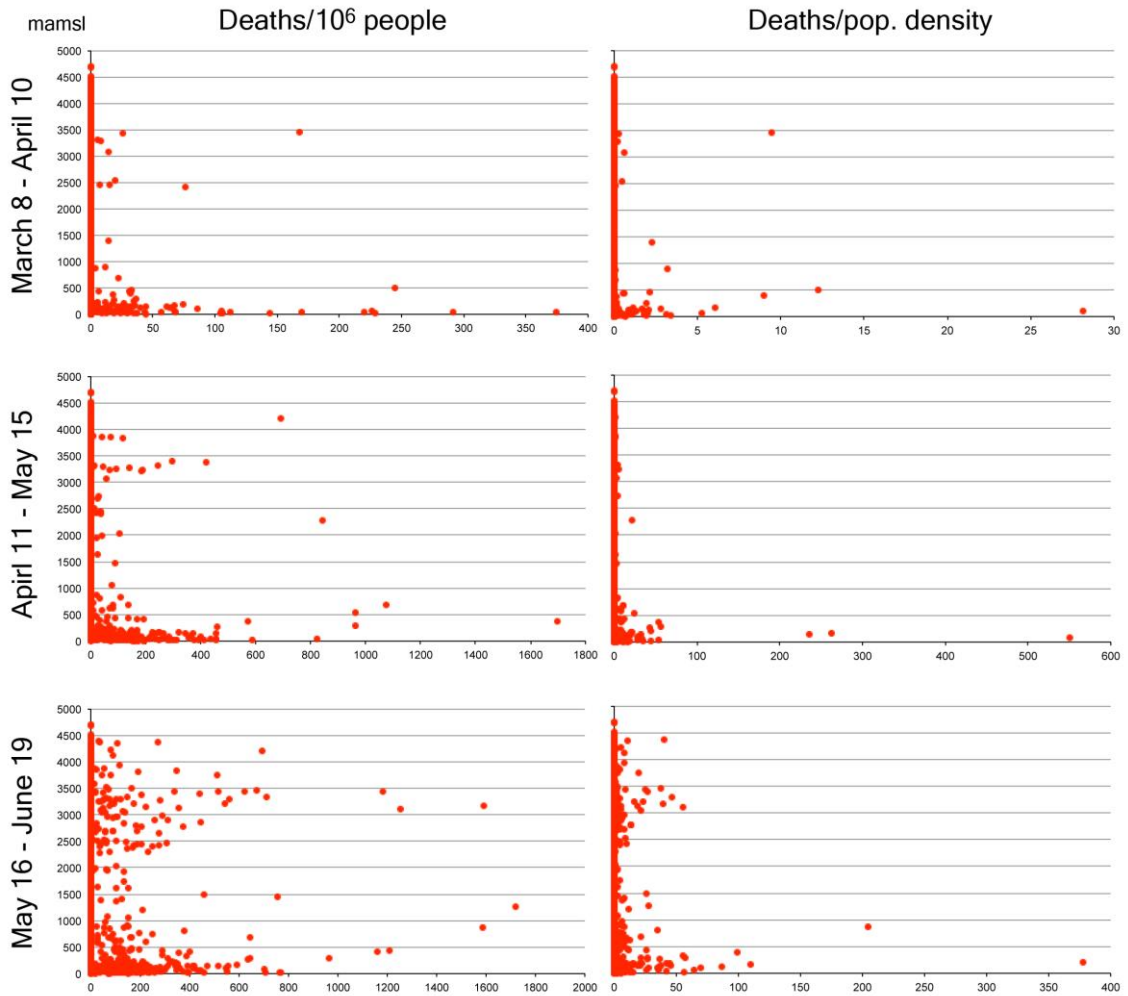

**Figure S2. Scatter plots of newly registered death rates vs. altitude.** Death rates were calculated from the death counts newly registered during the indicated periods and plotted as a function of altitude for all districts in Peru.

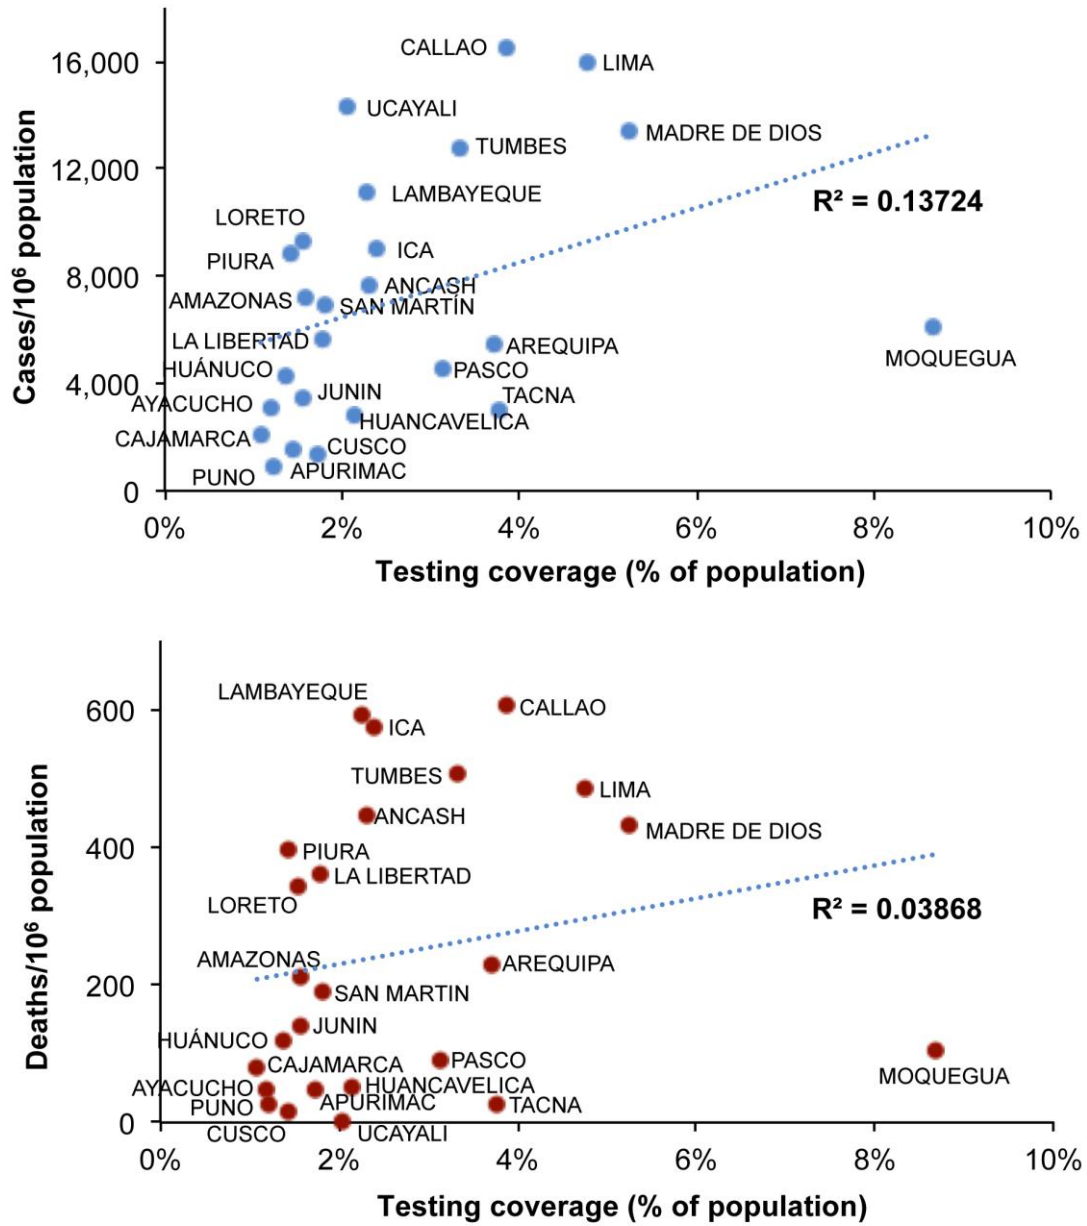

Figure S3. Testing coverage plotted vs. case and death rates per department.
